# Supplementary material for: Ectopic expression of PtaRHE1, encoding a poplar RING-H2 protein with E3 ligase activity, alters plant development and induces defence-related responses
Source: PubMed Central journal article supplement — J Exp Bot. 2009 Nov 5;61(1):297–310. doi: 10.1093/jxb/erp305 (PMC2791127; doi:10.1093/jxb/erp305), 2009-11-05
Supplement: erp305_1.pdf [file erp305_1.pdf]

**Ectopic expression of *PtaRHE1*, encoding a poplar RING-H2 protein with E3 ligase activity, alters plant development and induces defence related responses.** *J Mukoko Bopopi, OM Vandeputte, K Himanen, A Mol, Q Vaessen, M El Jaziri, and M Baucher*

## SUPPLEMENTARY DATA

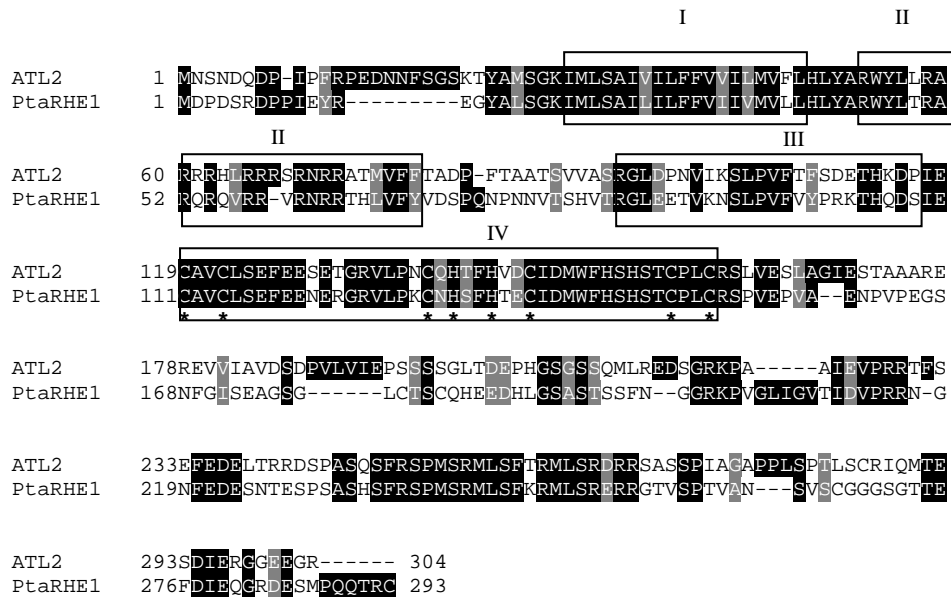

**Figure S1.** Alignment of the PtaRHE1 amino acid sequence with the *Arabidopsis* ATL2 (At3g16720) amino acid sequence. I. Hydrophobic region (TM domain). II. Basic region. III. Conserved region. IV. RING-H2 zinc finger domain. Black and grey boxes indicate strictly conserved amino acids and closely related amino acids, respectively. Asterisks indicate the position of cysteine and histidine residues of the RING-H2 domain.

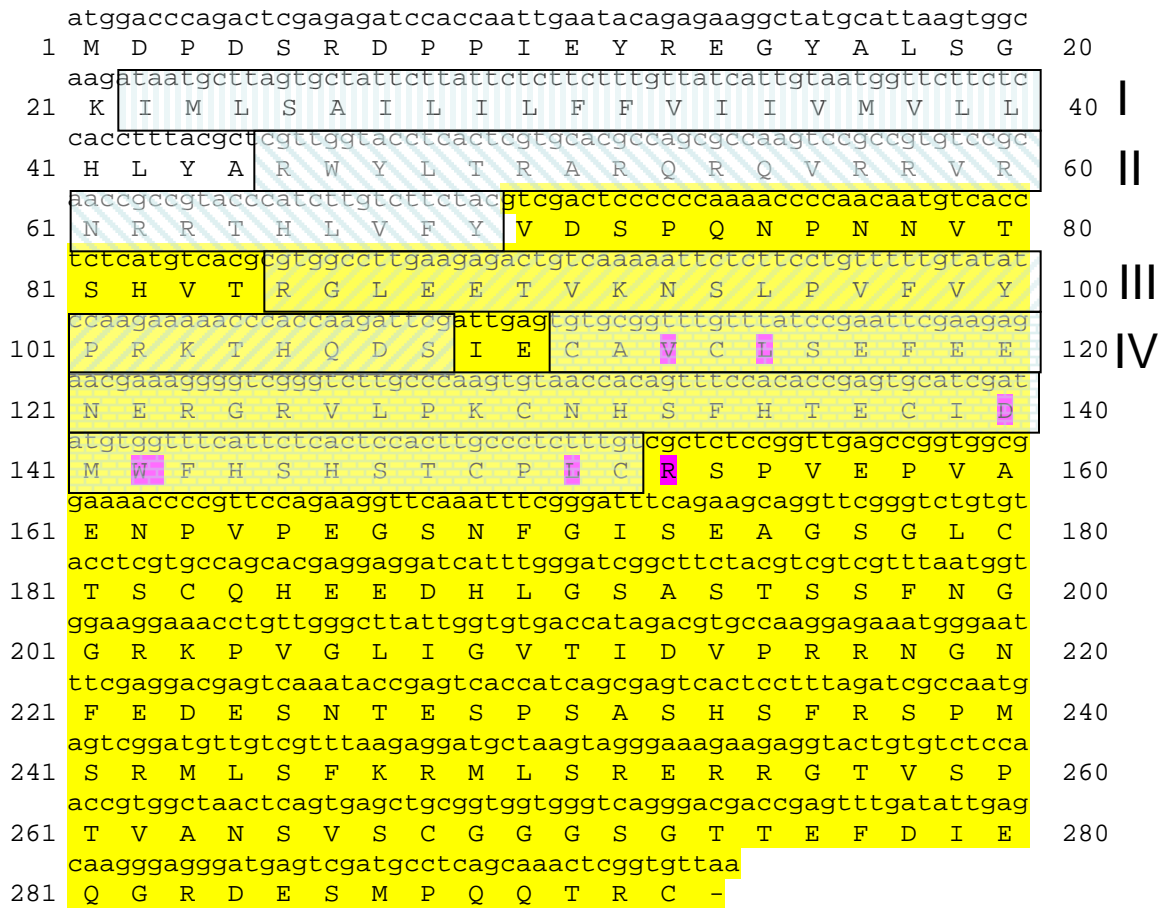

**Figure S2.** Sequences of PtaRHE1 full length and PtaRHE1-Ct (where the TM domain and the basic region were deleted). The PtaRHE1-Ct part is marked in yellow. I. Hydrophobic region. II. Basic region. III. Conserved region. IV. RING-H2 zinc finger domain (Salinas-Mondragón *et al.*, 1999). Residues marked in magenta were shown to be crucial for EL5-OsUBC5b binding (Kato et al., 2005).

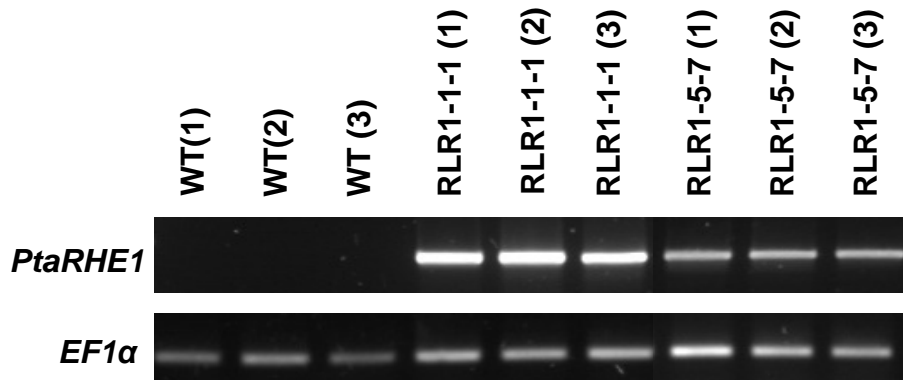

**Figure S3.** RT-PCR expression analysis of *PtaRHE1* in 3 individual plants of WT, RLR1-1-1, and RLR1-5-7. *EF1-α* was used as loading control. These lines were further used for RT-qPCR analysis (see Table 1).

-1208 CAAGTTGCAA CCGGATTATG ATCGTGTGCGT CAAGTCAACC CGCTAGGTCA  
 TACTGAGTTT TTTCTTTACT TGTATTTTTT TTAACCTAGC TCGGTTTCAA  
 CTCTGAGTTT CTAATCGATA CATCGAGTCA GGTTTTAAAA CTATGTTAAC  
 CTGTTTCATT ATTAACGACG TATATTATTT TAGGTGTGAC CAACAAAAAT  
 CAAACCAACC TTGAAGACGG CATCTAAGCA GAGGCAAATA ATTGATCCTT  
 TTTCTCTTTC GTGTTTCATT CCAAGTATGC ACGTGAATAT GGTTAGTTGC  
 GTTGAATGCT CTACGTATTC ATGTTCCAAA ATAGTCAAGT TGCCAACCCA  
 CGTGGCACTT TGAAACTCAG AAGAGTCAAA AGTAAACAAG TGTATTCAGT  
 GCCGTGAGGA TGTGGCAACT TTTCTAATGC AAGTTATTCA GACTTTTTTCT  
 TCCTTGATAA TATCAACTTA GGACTTAGCT TAATTGCTTT TTCCTTCACG  
 AACTTGCTCT TCTCCATTTC TTTACACAG AATGCATGTG AATGCGAATG  
 CAATTCTAT ATAAATATC CTTACTCTCC TCATTGTAAA TATCTTCACC  
 AACGACGTAG AAAAAAATTT AAATTAAATC TCGTATTAAT GAGTCAATCC  
 CGGGTTATTA GATTGACCCA GCAGGACATG CAAGGTTTTA TAACGACGTA  
 TTTAAGTTGA AAATCATGAA TAAAAATGAA AATTAATGTA ATCATGAGAG  
 GAAGGTGAAT TGGTTTGATC ACAAATTTG TTTTAAATG GTTATGAATT  
 TGAGTCCTTT TAGAATTACT AGAAAACATA TATAATATT AATTTTAAAA  
 TTCATGAAAT TAATCAAGAT ATACGTAAAC TAACTCAAAT ATTCATGTAA  
 ATTTGAAAAA GAAAAAATAA AAATTCATGC GAAATATTGG GCATTAATAG  
 AAGGACAATA AAGAGAATTC CTAGTAAAAG CCATCGTCAA CCCTGGCGTT  
 CTTCTTCCAT TTGTGTGAAC TAAGACTTCG AAGAAACCTT CAAGAACCTT  
 CCTCGTCCTC CTCCTCTCTC TCTTCATTAG TATTTCTCCT CCTTCCTTCA  
 TATACCAACT CCAAAAACAT TTTTCTCTCT TCATTGCTAA ACCAAACCCA

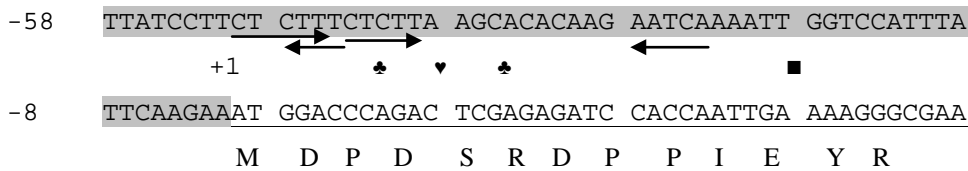

**Figure S4.** Nucleotide sequence of the 5'-flanking promoter region and putative *cis*-acting elements of the *PtaRHE1* promoter. The 5'UTR region is marked in grey and the coding sequence is underlined. The translational start site is denoted as +1. Putative CAAT- and TATA- boxes are boxed. Putative *cis*-acting elements are represented by a symbol and underlined by an arrow. ◻, W-box are binding sites for WRKY transcription factors (Eulgem *et al.*, 2000); WRKYs are involved in elicitor-responsive transcription of defense genes in tobacco (Yamamoto *et al.*, 2004); ▲, BS1 (binding site 1) found in *Eucalyptus gunnii cinnamoyl-CoA reductase* gene promoter and is required for vascular expression (Lacombe *et al.*, 2000); ▶, GT-1 binding motif found in the promoter of many light-regulated genes; Binding of GT-1-like factors to the PR-1a promoter influences the level of SA-inducible gene expression; Plays a role in pathogen- and salt-induced SCaM-4 gene expression (Buchel *et al.*, 1999; Park *et al.*, 2004); ▼, ABRE; ABA-responsive elements found in the promoter of ABA and/or stress-regulated genes (Nakashima *et al.*, 2006); ♦, ACGTERD1; ACGT sequence required for induction of expression of *erd1* in *Arabidopsis thaliana* by dehydration stress and dark-induced senescence (Simpson *et al.*, 2003); ◀, ACGTABOX, "A-box" ACGT elements which are binding sites for bZIP proteins (Foster *et al.*, 1994); ■, ARR1AT "ARR1-binding element" found in *A. thaliana* (Sakai *et al.*, 2000); ●, GTGANTG10; "GTGA motif" found in the promoter of the tobacco late pollen gene *g10* (Rogers *et al.*, 2001); ☼, HDZIP2ATATHB2, binding site of the *A. thaliana* homeobox gene *ATHB-2* found in its own promoter (Ohgishi *et al.*, 2001); ♠, MYB1(AT) sites are MYB recognition sites found in the promoters of the dehydration-responsive gene *rd22* and many other genes in *A. thaliana* (Abe *et al.*, 2003); ☉, MYC recognition sequence (from -466 to -461) necessary for expression of *erd1* in dehydrated *Arabidopsis* (Simpson *et al.*, 2003) and binding site of ATMYC2 which function as transcriptional activator in ABA signaling (Abe *et al.*, 2003); ○, POLLEN1LELAT52; one of two co-dependent regulatory elements responsible for pollen specific activation of tomato *lat52* gene (Bate and Twell, 1998); ■, RAV1AAT; binding consensus sequence of *A. thaliana* transcription factor, RAV1 (Kagaya *et al.*, 1999); ◇, ROOTMOTIFTAPOX1; motif found in both promoters of *rolD* (Elmayan and Tepfer, 1995); ♣ NODCON2GM, one of two putative nodulin consensus sequences (Stougaard *et al.*, 1990); ♥, Core site required for binding of Dof proteins (DNA binding with one finger), regulating

the expression of plant genes in response to light, developmental stage and hormone treatment such as gibberellin (Washio 2001).

#### **Figure S4, references**

- Abe H, Urao T, Ito T, Seki M, Shinozaki K, Yamaguchi-Shinozaki K.** 2003. Arabidopsis AtMYC2 (bHLH) and AtMYB2 (MYB) function as transcriptional activators in abscisic acid signaling. *The Plant Cell* **15**, 63-78.
- Bate N, Twell D.** 1998. Functional architecture of a late pollen promoter: pollen-specific transcription is developmentally regulated by multiple stage-specific and co-dependent activator elements. *Plant Molecular Biology* **37**, 859-869.
- Buchel AS, Brederode FTh, Bol JF, Linthorst HJM.** 1999. Mutation of GT-1 binding sites in the *Pr-IA* promoter influences the level of inducible gene expression *in vivo*. *Plant Molecular Biology* **40**, 387-396.
- Elmayan T, Tepfer M.** 1995. Evaluation of the organ specificity and strength of the roLD promoter, domain A of the 35S promoter and the 35S2 promoter. *Transgenic Research* **4**, 388-396.
- Eulgem T, Rushton PJ, Robatzek S, Somssich IE.** 2000. The WRKY superfamily of plant transcription factors. *Trends Plant Science* **5**, 199-206.
- Foster R, Izawa T, Chua N-H.** 1994. Plant bZIP proteins gather at ACGT elements. *The FASEB Journal* **8**, 192-200.
- Kagaya Y, Ohmiya K, Hattori T.** 1999. RAV1, a novel DNA-binding protein, binds to bipartite recognition sequence through two distinct DNA-binding domains uniquely found in plants. *Nucl. Acids Research* **27**, 470-478.
- Lacombe E, Van Doorselaere J, Boerjan W, Boudet AM, Grima-Pettenati J.** 2000. Characterization of cis-elements required for vascular expression of the Cinnamoyl CoA Reductase gene and for protein-DNA complex formation. *The Plant Journal* **23**, 663-676.
- Nakashima K, Fujita Y, Katsura K, Maruyama K, Narusaka Y, Seki M, Shinozaki K, Yamaguchi-Shinozaki K.** 2006. Transcriptional regulation of ABI3- and ABA-responsive genes including *RD29B* and *RD29A* in seeds, germinating embryos, and seedling of *Arabidopsis*. *Plant Molecular Biology* **60**, 51-68.
- Ohgishi M, Oka A, Morelli G, Ruberti G, Aoyama T.** 2001. Negative autoregulation of the *Arabidopsis* homeobox gene *ATHB-2*. *The Plant Journal* **25**, 389-398.

- Park HC, Kim ML, Kang YH, Jeon JM, Yoo JH, Kim MC, Park CY, Jeong JC, Moon BC, Lee JH et al.** 2004. Pathogen and NaCl-induced expression of the SCaM-4 promoter is mediated in part by a GT-1 box that interacts with a GT-1-like transcription factor. *Plant Physiology* **135**, 2150-2161.
- Rogers HJ, Bate N, Combe J, Sullivan J, Sweetman J, Swan C, Lonsdale DM, Twell D.** 2001. Functional analysis of *cis*-regulatory elements within the promoter of the tobacco late pollen gene *g10*. *Plant Molecular Biology* **45**, 577-585.
- Sakai H, Aoyama T, Oka A.** 2000. Arabidopsis ARR1 and ARR2 response regulators operate as transcriptional activators. *The Plant Journal* **24**, 703-711.
- Simpson SD, Nakashima K, Narukasa Y, Seki M, Shinozaki K, Yamaguchi-Shinozaki K.** 2003. Two different novel *cis*-acting elements of *erd1*, a *clpA* homologous *Arabidopsis* gene function in induction by dehydration stress and dark-induced senescence. *The Plant Journal* **33**, 259-270.
- Stougaard J, Jørgensen J-E, Christensen T, Kühle A, Marcker, KA.** 1990. Interdependence and nodule specificity of *cis*-acting regulatory elements in the soybean leghemoglobin *lbc3* and N23 gene promoters. *Molecular and General Genetics* **220**, 353-360.
- Yamamoto S, Nakano T, Susuki K, Sinshi H.** 2004. Elicitor-induced activation of transcription via W box-related *cis*-acting elements from a basic chitinase gene by WRKY transcription factors in tobacco. *Biochimica et Biophysica Acta* **1679**, 279-287.
- Washio K.** 2001. Identification of Dof proteins with implication in the gibberellin-regulated expression of a peptidase gene following the germination of rice grains. *Biochimica et Biophysica Acta* **1520**, 54-62.

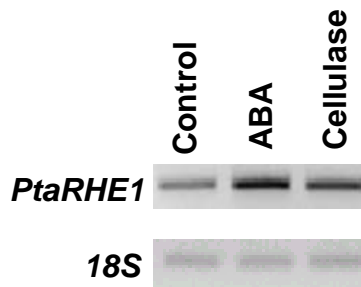

**Figure S5.** RT-PCR expression analysis of *PtaRHE1* in poplar leaves treated during 8 h with Cel (100  $\mu\text{g/ml}$ ) and ABA (150  $\mu\text{M}$ ). *18S* was used as a loading control.



**Table S1.** Primer sequences and amplicon size for RT-PCR and RT-qPCR. The gene classification was based on literature data.

| Gene                                       | Accession         | Forward primer<br>(5'→3') | Reverse primer<br>(5'→3') | Size<br>(bp) | References                       |
|--------------------------------------------|-------------------|---------------------------|---------------------------|--------------|----------------------------------|
| PtaRHE1                                    | AY780430          | ATGGACCCAGACTCGAGAGA      | TTAACACCGAGTTTGCTGAGG     | 882          | This study                       |
| <b>1. Defence/elicitor inducible genes</b> |                   |                           |                           |              |                                  |
| PR1A                                       | X06361            | ATGCGCAAAATTATGCTTCC      | CCTAGCACATCCAACACGAA      | 242          | Cornelissen <i>et al.</i> , 1986 |
| PR1B                                       | X17680            | GCAGACTGCAACCTCGTACA      | CCTAGCACATCCAACACGAA      | 213          | Cornelissen <i>et al.</i> , 1986 |
| TIZZ                                       | AB024510          | TGCCCAGTCAAGAAGAAGGT      | AAGGAAGATGCCATTTGTGC      | 224          | Yoda <i>et al.</i> , 2002        |
| PR5 (osmotin)                              | X95308            | ATCGAGGTCCGAAACAACCTG     | AGGACTCCACCACAGTCACC      | 203          | Kumar and Spencer, 1992          |
| SAR8.2A                                    | M97194            | GCCTTTCTTTGGCTATTTTTGG    | AGCTTTGCCAATGATTTTTGC     | 200          | Alexander <i>et al.</i> , 1992   |
| PR3 (CHN50)                                | X51599            | CAGCAAATTTGGTTGGTGTG      | CTTGGCATGCATTATCGTTG      | 170          | Fukuda <i>et al.</i> , 1991      |
| HSR201                                     | X95343            | TGGGAAAAGCAGTTTATGG       | TCTCAAAGGGCAGGTCTGAT      | 233          | Czernic <i>et al.</i> , 1996     |
| HMGR2                                      | AF004232          | GGCAACCACTGAAGGATGTT      | TGGTTGAAAACAGCAGCAAG      | 207          | Genschik <i>et al.</i> , 1992    |
| WRKY12                                     | DQ460475          | ACCGAGCTTGAGATCTTGGA      | AAGGGGCTTTCATGATTGTG      | 200          | van Verk <i>et al.</i> , 2008    |
| EDS1                                       | AF480489          | AGGCCGAAGCGTTATAGGTT      | AAAACATCATCGCCAGAAAG      | 203          | Zhang <i>et al.</i> , 2004       |
| PR4                                        | AF154635          | TTCCATGTGGCGAGTCATTA      | CAACATGCAATGCCAAGTCT      | 208          | Ward <i>et al.</i> , 1991        |
| WIPK                                       | AB098729 (NB)     | TCATGTGAACCCATTGGCTA      | GATTCAGCGACAAAGCTTCC      | 227          | Yang <i>et al.</i> , 2001        |
| LSD1                                       | EB448923 (EST NT) | CAGCTCGAGGTCCTAACCAG      | GTTCTGAACGACCACGGTTT      | 245          | Dietrich <i>et al.</i> , 1997    |
| SAMDEC                                     | AF033100          | CCCATCCTAAAGTTGGCTGA      | ATAGGTCCTGCAGAGGCAGA      | 233          | Yoda <i>et al.</i> , 2003        |
| BECLIN1                                    | BP534310 (EST NT) | TAGCCGCTTTAAGGAGTTGG      | CCCCTCAACCGGAATTTTA       | 245          | Liu <i>et al.</i> , 2005         |
| DND1                                       | DV162472 (EST NT) | TGAGCTTCTTTCCTGGTGCT      | AACGACGCCAAGCTAACTGT      | 239          | Clough <i>et al.</i> , 2000      |
| ABAKIN                                     | EB684220 (EST NT) | GAACACCAGCAGTGGGATCT      | CAGTCCAGTGCACAAAGCAT      | 216          | Kim <i>et al.</i> , 2006         |
| NPR1                                       | AF480488          | TAGCGTATTGCGATGCAAAG      | TAGTGAGCCTCTTGCGGATT      | 213          | Liu <i>et al.</i> , 2002         |
| HSP90                                      | AB264546          | GAAGGCACAAGCACTTAGGG      | TGCCAAAGGTGTTAGGTTCC      | 215          | Takabatake <i>et al.</i> , 2007  |
| SIPK                                       | AB098730 (NB)     | CCGTCGACAATCATTCACTG      | GCGACTCCCTGTAAATCAGC      | 245          | Yang <i>et al.</i> , 2001        |
| S26-PR6                                    | U44760            | ACATGATTTTGCCTTGACACA     | TGTTTGCCAAGTCACTCCTG      | 245          | Kim <i>et al.</i> , 2003         |

|         |               |                      |                       |     |                                  |
|---------|---------------|----------------------|-----------------------|-----|----------------------------------|
| NTMEK2  | AB264547      | ATTGCTGACTTTGGGGTGTC | TCCCAACAGAAAACGGAAAC  | 205 | Yang <i>et al.</i> , 2001        |
| HSR203J | AB091430      | TATCCGGCTGGCTTACAGTT | ACGGAATTGTCTGTTTCGTTC | 199 | Pontier <i>et al.</i> , 1994     |
| SperSy  | AF321139      | CACATTGGTGATGGAGTTGC | GCAATTGGCAACGATTTCTT  | 222 | Yoda <i>et al.</i> , 2003        |
| WIZZ    | AB028022      | AGGCAGGTGATTTGTTGGAG | TTGTTGTTGTTGGGATTGGA  | 208 | Yoda <i>et al.</i> , 2002        |
| NOA1    | AB303300 (NB) | GTGTTGGTGACTGGGTTGTG | GGCTGCAACTGGGTCATTAT  | 227 | Kato <i>et al.</i> , 2008        |
| Polyox  | AB200262      | GTGTTCTCCAAAGCGACCTC | CGGGTAAGCATTTCTCCATGT | 215 | Yoda <i>et al.</i> , 2003        |
| PR1C    | X17681        | CTCCGGTGCCAGGTAAAATA | TCCTGTTTTCCAGGTTACCA  | 202 | Cornelissen <i>et al.</i> , 1986 |
| HSR515  | X95342        | GACAGTGGAGTGGGCAATTT | CTCGACTCCGTAGCCTTC    | 200 | Czernic <i>et al.</i> , 1996     |

## 2. Cell death induced by proteasome malfunction related genes

|               |                   |                       |                       |     |                          |
|---------------|-------------------|-----------------------|-----------------------|-----|--------------------------|
| 20S prot.     | DV162364 (EST NT) | AATGGCCAGCATAGGAACAG  | GGAATGGCGATGAACAGAGT  | 223 | Kim <i>et al.</i> , 2006 |
| UBIPROT6      | EB446639 (EST NT) | ACGGTTTTTGCGAAGAAATA  | GCCACTTTTCCAGACAATGAA | 204 | Kim <i>et al.</i> , 2006 |
| UBIPROT12     | EB426207 (EST NT) | GTATCCAGCCGCTTTCAGAG  | GGCCTATGTGAAGAGCAAG   | 225 | Kim <i>et al.</i> , 2006 |
| BS2           | AM847972 (ESTNT)  | CTGGAAAGCCACAGATGACA  | GAACATCCACGGGTTTGATT  | 206 | Kim <i>et al.</i> , 2006 |
| NAM-like      | EB441345 (EST NT) | TTTGCAAAAACCTTGGTGCTG | CCCAAGGCTCGAGTTTACAG  | 237 | Kim <i>et al.</i> , 2006 |
| CLpP PROTEASE | U32397            | CCTGGGGTGGCTATTTATGA  | CAGGACAAATTCGCCTGTTT  | 201 | Kim <i>et al.</i> , 2003 |

## 3. Both defence and proteasome malfunction cell death induced genes

|         |                   |                      |                      |     |                                                        |
|---------|-------------------|----------------------|----------------------|-----|--------------------------------------------------------|
| PR2     | M60460            | CAACCCGCCCAAAGATAGTA | CCAAAAGGGCATCAAAAAGA | 218 | Ward <i>et al.</i> , 1991; Kim <i>et al.</i> , 2003    |
| HIN1    | AB091429          | CAGCTTGCGTCCAGTATTCA | GGCATCTGGTTTCTCATAAA | 245 | Gopalan <i>et al.</i> , 1996; Kim <i>et al.</i> , 2003 |
| NtCP-23 | AB032168          | TCGATCGCACAACAAGAAAG | GTGCTGAATGTCCAGCAAGA | 240 | Ueda <i>et al.</i> , 2000; Kim <i>et al.</i> , 2003    |
| SGT1    | EB449104 (EST NT) | TCATCGACGACCACTTTGAG | AGCTGCTTTTGCAGTTTGGT | 239 | Peart <i>et al.</i> , 2002; Kim <i>et al.</i> , 2006   |

## 4. Apoptosis related genes

|      |                   |                      |                      |     |                              |
|------|-------------------|----------------------|----------------------|-----|------------------------------|
| BI-1 | AF390556          | GGCTTTTGTTGCTTCTCAG  | CCAAGGTGTGCCTTCTCAAT | 231 | Bolduc and Brisson, 2002     |
| DAD1 | DW001598 (EST NT) | AGAGACGCCCAAGCTCTTTT | TCGAAGACAAACAGCAAGGA | 213 | Gallois <i>et al.</i> , 1997 |

## 5. Leaf senescence specific gene

|     |          |                      |                      |     |                             |
|-----|----------|----------------------|----------------------|-----|-----------------------------|
| CP1 | AY881011 | CGAGAAAGAAGTGCCTTTCC | TGGCGGTATGTCTGTCACAT | 229 | Beyene <i>et al.</i> , 2006 |
|-----|----------|----------------------|----------------------|-----|-----------------------------|

## 6. Oxidative stress related genes

|          |               |                      |                        |     |                               |
|----------|---------------|----------------------|------------------------|-----|-------------------------------|
| APX      | U15933        | GGACCTGATGTTCCCTTTCA | GGGGATTGGTAGTCCAAGGT   | 223 | Mittler <i>et al.</i> , 1999  |
| SOD      | X14482        | GTGAGCAGACGGACCTTAGC | GGCGTCATGTAGCTGTTCAA   | 204 | Bowler <i>et al.</i> , 1989   |
| NBRBOHA  | AB079498 (NB) | TCAAGAACTCAAGCGGGTCT | CCATTTTCACGATGTTGACG   | 242 | Yoshioka <i>et al.</i> , 2003 |
| EF1ALPHA | D63396        | TGCTACCACCCCAAGTACTC | TAAAGCTGGCAGCACCCCTTAG | 512 | This study                    |

---

NB, *N. benthamiana*; NT, *N. tabacum*

## Table S1: References

- Alexander D, Stinson J, Pear J, Glascock C, Ward E, Goodman RM, Ryals J.** 1992. A new multigene family inducible by tobacco mosaic virus or salicylic acid in tobacco. *Molecular Plant-Microbe Interactions* **5**, 513-515.
- Beyene G, Foyer CH, Kunert KJ.** 2006. Two new cysteine proteinases with specific expression patterns in mature and senescent tobacco (*Nicotiana tabacum* L.) leaves. *Journal of Experimental Botany* **57**, 1431-1443.
- Bolduc N, Brisson LF.** 2002. Antisense down regulation of NtBI-1 in tobacco BY-2 cells induces accelerated cell death upon carbon starvation. *FEBS Letters* **532**, 111-114.
- Bowler C, Alliotte T, De Loose M, Van Montagu M, Inzé D.** 1989. The induction of manganese superoxide dismutase in response to stress in *Nicotiana plumbaginifolia*. *The EMBO Journal* **8**, 31-38.
- Clough SJ, Fengler KA, Yu I-C, Lippok B, Smith RK Jr.** 2000. The *Arabidopsis dnd1* “defense, no death” gene encodes a mutated cyclic nucleotide-gated ion channel *Proceedings of the National Academy of Sciences, USA* **97**, 9323-9328.
- Cornelissen BJC, Hoof van Huijsduijen RAM, Van Loon LC, Bol JF.** 1986. Molecular characterization of messenger RNAs for ‘pathogenesis-related’ proteins 1a, 1b and 1c, induced by TMV infection of tobacco. *The EMBO Journal* **5**, 37-40.
- Czernic P, Huang HC, Marco Y.** 1996. Characterization of *hsr201* and *hsr515*, two tobacco genes preferentially expressed during the hypersensitive reaction provoked by phytopathogenic bacteria. *Plant Molecular Biology* **31**, 255-265.
- Dietrich RA, Richberg MH, Schmidt R, Dean C, Dangl JL.** 1997. A novel zinc finger protein is encoded by the *Arabidopsis LSD1* gene and functions as a negative regulator of plant cell death. *Cell* **88**: 685-694.
- Fukuda Y, Ohme M, Shinshi H.** 1991. Gene structure and expression of a tobacco endochitinase gene in suspension-cultured tobacco cells. *Plant Molecular Biology* **16**, 1-10.
- Gallois P, Makishima T, Hecht V, Despres B, Laudie M, Nishimoto T, Cooke R.** 1997. An *Arabidopsis thaliana* cDNA complementing a hamster apoptosis suppressor mutant. *Plant Journal* **11**, 1325-1331.
- Genschik P, Criqui MC, Parmentier Y, Marbach J, Durr A, Fleck J, Jamet E.** 1992. Isolation and characterization of a cDNA encoding a 3-hydroxy-3-methylglutaryl coenzyme A reductase from *Nicotiana sylvestris*. *Plant Molecular Biology* **20**, 337-341.
- Gopalan S, Wei W, He SY.** 1996. *hrp* gene-dependent induction of *hin1*: a plant gene activated rapidly by both harpins and the *avrPto* gene-mediated signal. *Plant Journal* **10**, 591-600.
- Kato H, Asai S, Yamamoto-Katou A, Yoshioka H, Doke N, Kawakita K.** 2008. Involvement of *NbNOA1* in NO production and defense responses in INF1-treated *Nicotiana benthamiana*. *Journal of General Plant Pathology* **74**, 15-23 .
- Kim M, Ahn J-W, Jin U-H, Choi D, Paek K-H, Pai H-S.** 2003. Activation of the programmed cell death pathway by inhibition of proteasome function in plants. *Journal of Biological Chemistry* **278**, 19406-19415

- Kim M, Lee S, Park K, Jeong E-J, Ryu C-M, Choi D, Pai H-S.** 2006. Comparative microarray analysis of programmed cell death induced by proteasome malfunction and hypersensitive response in plants. *Biochemical and Biophysical Research Communications* **342**, 514-521.
- Kumar V, Spencer ME.** 1992. Nucleotide sequence of an osmotin cDNA from the *Nicotiana tabacum* cv. White Burley generated by the polymerase chain reaction. *Plant Molecular Biology* **18**, 621-622.
- Liu Y, Schiff M, Marathe R, Dinesh-Kumer SP.** 2002. Tobacco *Rar1*, *EDS1* and *NPR1/NIM1* like genes are required for *N*-mediated resistance to tobacco mosaic virus. *The Plant Journal* **30**, 415-429.
- Liu Y, Schiff M, Czymmek K, Tallóczy Z, Levine B, Dinesh-Kumar SP.** 2005. Autophagy regulates programmed cell death during the plant innate immune response. *Cell* **121**, 567-577.
- Mittler R, Herr EH, Orvar BL, van Camp W, Willekens H, Inzé D, Ellis BE.** 1999. Transgenic tobacco plants with reduced capability to detoxify reactive oxygen intermediates are hyperresponsive to pathogen infection. *Proceedings of the National Academy of Sciences, USA* **96**, 14165-14170.
- Peart JR, Cook G, Feys BJ, Parker JE, Baulcombe DC.** 2002. An *EDS1* orthologue is required for *N*-mediated resistance against tobacco mosaic virus. *The Plant Journal* **29**, 569-579.
- Pontier D, Godiard L, Marco Y, Roby D.** 1994. *hsr203J*, a tobacco gene whose activation is rapid, highly localized and specific for incompatible plant/pathogen interaction. *The Plant Journal* **5**, 507-521.
- Takabatake R, Ando Y, Seo S, Katou S, Tsuda S, Ohashi Y, Mitsuhashi I.** 2007. MAP kinases function downstream of HSP90 and upstream of mitochondria in TMV resistance gene *N*-mediated hypersensitive cell death. *Plant and Cell Physiology* **48**, 498-510.
- Ueda T, Seo S, Ohashi Y, Hashimoto J.** 2000. Circadian and senescence-enhanced expression of a tobacco cysteine protease gene. *Plant Molecular Biology* **44**, 649-657.
- van Verk MC, Pappaioannou D, Neeleman L, Bol JF, Linthorst HJM.** 2008. A novel WRKY transcription factor is required for induction of *PR-1a* gene expression by salicylic acid and bacterial elicitors. *Plant Physiology* **146**, 1983-1995.
- Ward ER, Uknes SJ, Williams SC, Dincher SS, Wiederhold DL, Alexander DC, Ahl-Goy P, Métraux J-P, Ryals JA.** 1991. Coordinate gene activity in response to agents that induce systemic acquired resistance. *The Plant Cell* **3**, 1085-1094.
- Yang K-Y, Liu Y, Zhang S.** 2001. Activation of a mitogen-activated protein kinase pathway is involved in disease resistance in tobacco. *Proceedings of the National Academy of Sciences, USA* **98**, 741-746.
- Yoda H, Ogawa M, Yamaguchi Y, Koizumi N, Kusano T, Sano H.** 2002. Identification of early-responsive genes associated with the hypersensitive response to tobacco mosaic virus and characterization of a WRKY-type transcription factor in tobacco plants. *Molecular Genetics and Genomics* **267**, 154-161.
- Yoda H, Yamaguchi Y, Sano H.** 2003. Induction of hypersensitive cell death by hydrogen peroxide produced through polyamine degradation in tobacco plants. *Plant Physiology* **132**, 1973-1981.
- Yoshioka H, Numata N, Nakajima K, Katou S, Kawakita K, Rowland O, Jones JDG, Doke, N.** 2003. *Nicotiana benthamiana* gp91<sup>phox</sup> homologs *NbrbohA* and *NbrbohB* participate in H<sub>2</sub>O<sub>2</sub> accumulation and resistance to *Phytophthora infestans*. *The Plant Cell* **15**, 706-718.
- Zhang Y, Dorey S, Swiderski M, Jones JDG.** 2004. Expression of *RPS4* in tobacco induces an AvrRps4-independent HR that requires EDS1, SGT1, and HSP90. *The Plant Journal* **40**, 213-224.
